# Supplementary material for: CRISPR/Cas9-mediated PD-1 disruption enhances anti-tumor efficacy of human chimeric antigen receptor T cells
Source: PubMed Central journal article supplement (PMC5428439; doi:10.1038/s41598-017-00462-8), 2017-04-07
Supplement: 41598_2017_462_MOESM1_ESM.pdf [file 41598_2017_462_MOESM1_ESM.pdf]

**Supplementary Materials:**

**CRISPR/Cas9-mediated PD-1 disruption enhances anti-tumor efficacy of human chimeric antigen receptor T cells**

**Authors:** Levi J. Rupp<sup>1,2,3,4,†</sup>, Kathrin Schumann<sup>3,5,6†</sup>, Kole T. Roybal<sup>1,2,3</sup>, Rachel E. Gate<sup>7,8</sup>, Chun J. Ye<sup>7</sup>, Wendell A. Lim<sup>1,2,3,4,\*</sup>, Alexander Marson<sup>3,5,6,9,10</sup>

**Affiliations:**

<sup>1</sup>Department of Cellular & Molecular Pharmacology

<sup>2</sup>Center for Systems and Synthetic Biology

<sup>3</sup>Helen Diller Family Comprehensive Cancer Center, University of California San Francisco, San Francisco, CA 94158.

<sup>4</sup>Howard Hughes Medical Institute.

<sup>5</sup>Diabetes Center, University of California San Francisco, San Francisco, CA 94143.

<sup>6</sup>Department of Microbiology and Immunology, University of California San Francisco, San Francisco, CA 94143.

<sup>7</sup>Department of Epidemiology and Biostatistics, Department of Bioengineering and Therapeutic Sciences, Institute for Human Genetics, University of California, San Francisco, CA 94143

<sup>8</sup>Biological and Medical Informatics Graduate Program, University of California, San Francisco, CA 94158

<sup>9</sup>Division of Infectious Diseases and Rheumatology, Department of Medicine, University of California San Francisco, San Francisco, CA 94143.

<sup>10</sup>Innovative Genomics Initiative, University of California Berkeley, Berkeley, CA 94720.

†Denotes equal contribution

\*Correspondence: Wendell.lim@ucsf.edu

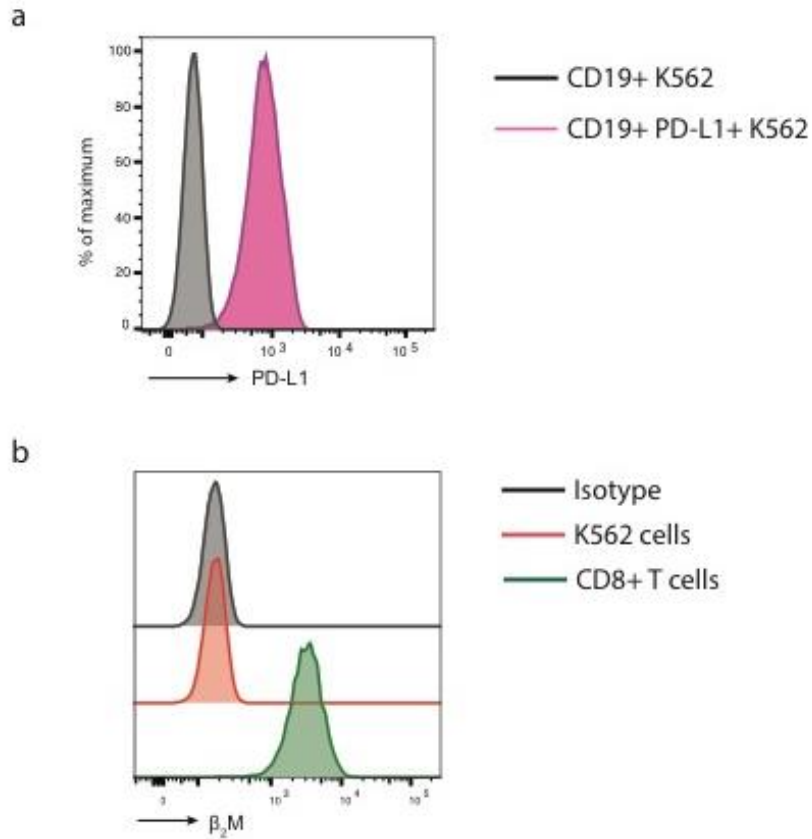

**Supplementary Fig. 1. Characterization of CD19+ PD-L1+ K562 cell line.** (a) Surface expression of human PD-L1 on transduced or parental CD19+ K562 cell lines. (b) Surface expression of beta-2-microglobulin ( $\beta_2M$ ) in CD19+ K562 cells and control CD8+ T cells as assayed by flow cytometry.

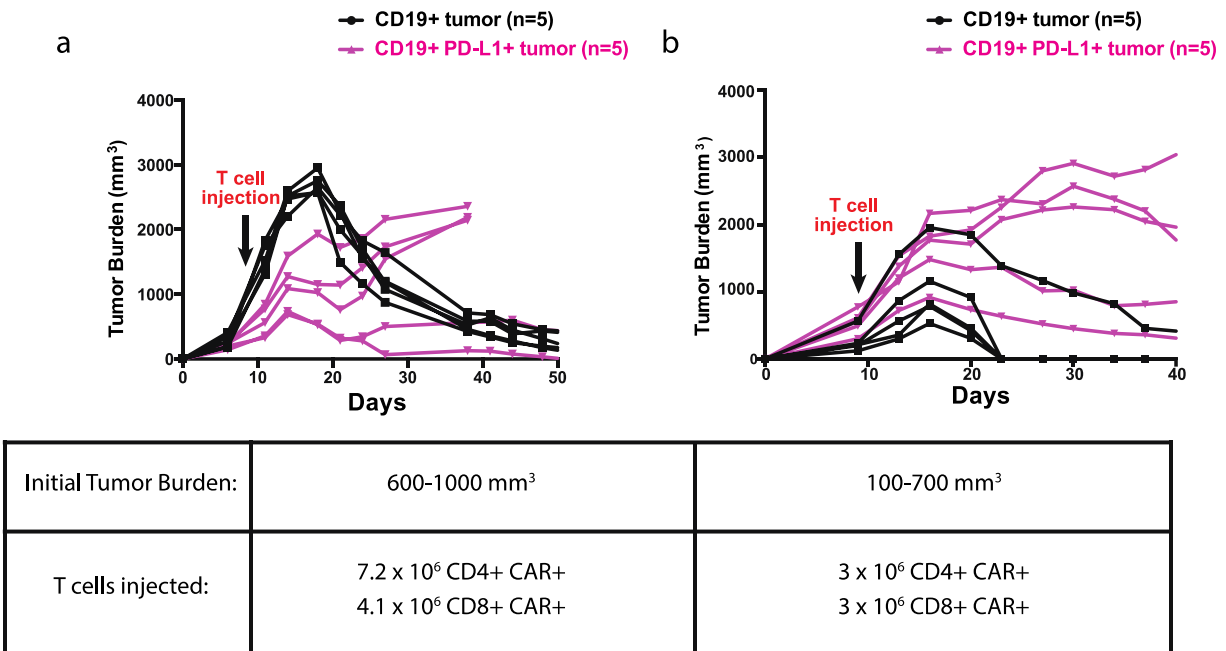

**Supplementary Fig. 2. Impaired clearance of CD19+ PD-L1+ tumor xenografts across multiple initial tumor burdens and anti-CD19 CAR T cell doses. (a)** NOD-*scid*-IL-2R $\gamma^{-/-}$  (NSG) mice were injected with  $5 \times 10^6$  CD19+ or CD19+ PD-L1+ K562 cells subcutaneously. Tumors were established at 600-1000 mm<sup>3</sup> and mice were treated with  $7.2 \times 10^6$  CD4+ and  $4.1 \times 10^6$  CD8+ anti-CD19 CAR+ T cells. Tumor burden was measured longitudinally by caliper; curves show individual mice (n=5 per group). **(b)** NOD-*scid*-IL-2R $\gamma^{-/-}$  (NSG) mice were injected with  $5 \times 10^6$  CD19+ or CD19+ PD-L1+ K562 cells subcutaneously. Tumors were established at 100-700 mm<sup>3</sup> and mice were treated with  $3 \times 10^6$  CD4+ and  $3 \times 10^6$  CD8+ anti-CD19 CAR+ T cells. Tumor burden was measured longitudinally by caliper; curves show individual mice (n=5 per group).

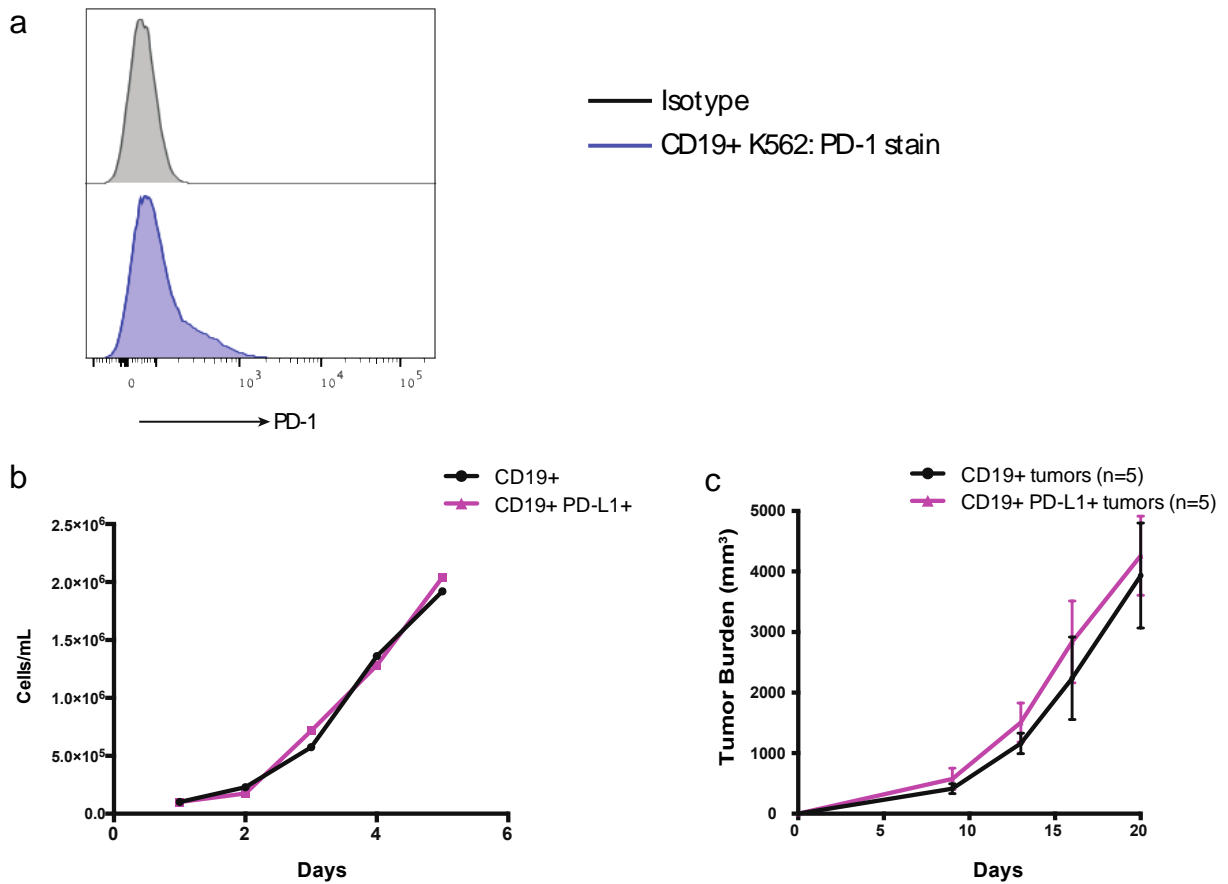

**Supplementary Fig. 3. PD-1 expression and growth kinetics of CD19+ and CD19+ PD-L1+ cells lines.** (a) Surface PD-1 expression in CD19+ K562 cultures as assayed by flow cytometry. (b) *In vitro* growth kinetics of CD19+ and CD19+ PD-L1+ cells.  $1 \times 10^5$  cells/mL were seeded on day 0 and cells were counted daily for 5 days. (c) *In vivo* growth kinetics of CD19+ and CD19+ PD-L1+ cells. NSG mice were injected subcutaneously with  $5 \times 10^6$  CD19+ or CD19+ PD-L1+ K562 cells and tumor burden measured longitudinally by caliper. Tumor burdens are mean  $\pm$ S.D.

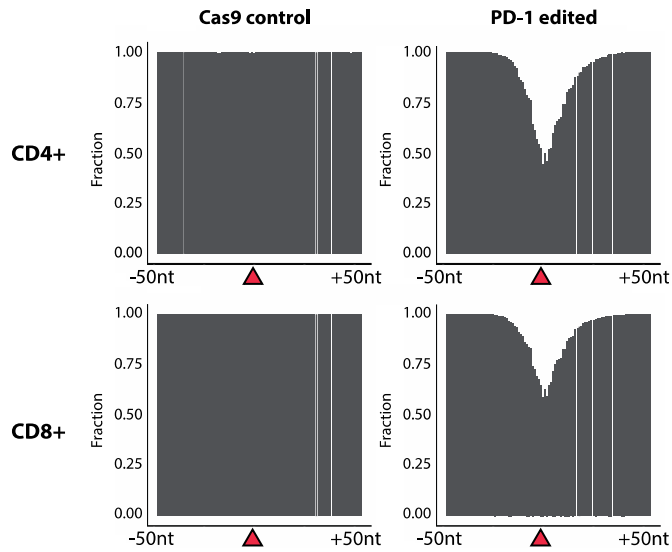

**Supplementary Fig. 4. Deep sequencing of *Pdccl1* locus in control and PD-1 edited cells.**

Deep sequencing of the PD-1 target site in Cas9 control or PD-1 edited cells. Fraction represents the proportion of reads mapping to the reference sequence for a given nucleotide in a 100 base window spanning the cut site (denoted by ▲).

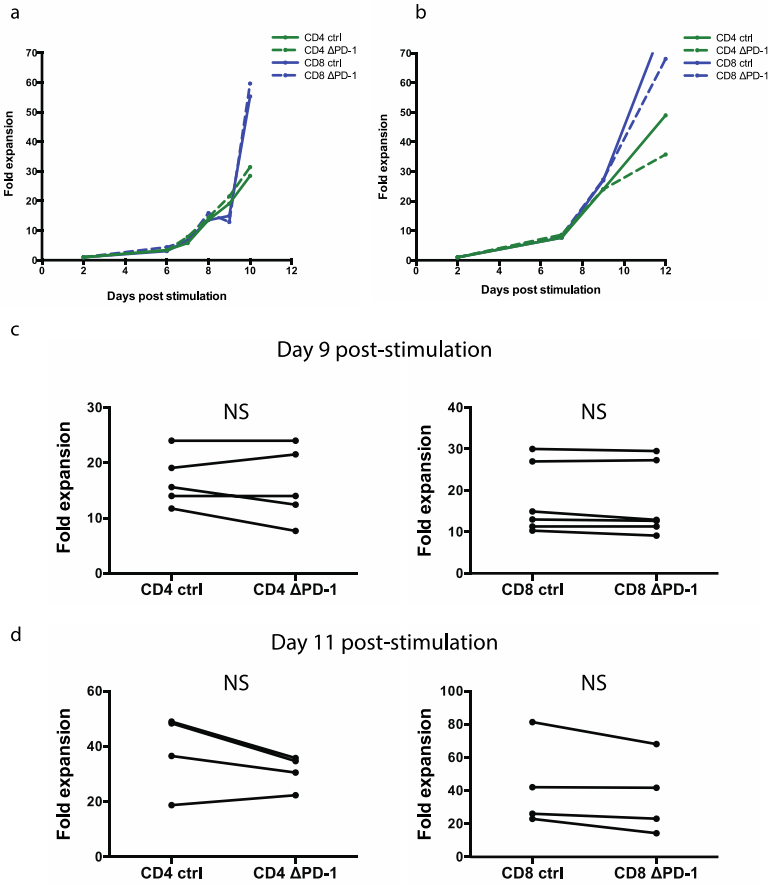

**Supplementary Fig. 5. No impairment of CAR T cell expansion following *Pdcd1* editing via CRISPR.** (a) Fold expansion of Cas9 control and PD-1 edited CD4+ or CD8+ T cells during representative experiment with no difference in expansion between treatment conditions. (b) Fold expansion of Cas9 control and PD-1 edited CD4+ or CD8+ T cells during representative experiment with reduced expansion of PD-1 edited cells following stimulation. (c) Fold expansion of Cas9 control and PD-1 edited CD4+ or CD8+ T cells 9 days after stimulation across multiple experiments. NS = not statistically significant; paired t-test. (d) Fold expansion of Cas9 control and PD-1 edited CD4+ or CD8+ T cells 11 days after stimulation across multiple experiments. NS = not statistically significant; paired t-test.

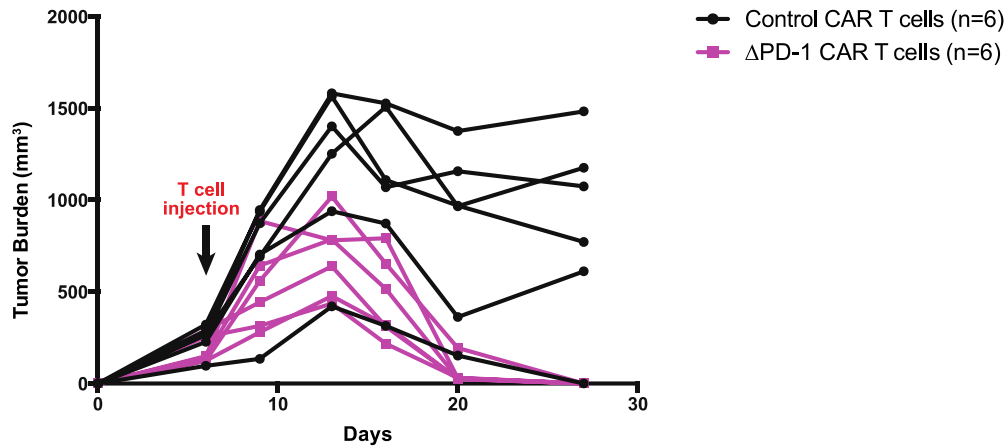

|                       |                                                                |
|-----------------------|----------------------------------------------------------------|
| Initial Tumor Burden: | 100-250 mm <sup>3</sup>                                        |
| T cells injected:     | 4 x 10 <sup>6</sup> CD4+ CAR+<br>4 x 10 <sup>6</sup> CD8+ CAR+ |

**Supplementary Fig. 6. Improved clearance of CD19+ PD-L1+ tumor xenografts with PD-1 edited CAR T cells.** Longitudinal tumor burdens for individual mice from experiment shown in Fig. 3d. NSG mice were injected with 5 x 10<sup>6</sup> CD19+ PD-L1+ K562 cells subcutaneously. Mice with established tumors (100-250 mm<sup>3</sup>) were injected intravenously with 4 x 10<sup>6</sup> CD4+ CAR+ and 4 x 10<sup>6</sup> CD8+ CAR+ control T cells or PD-1 edited cells, and tumor burden measured longitudinally by caliper.

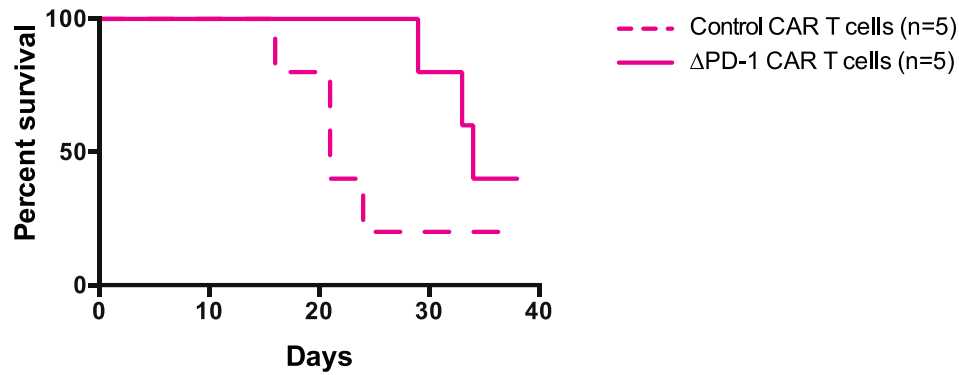

|                       |                                                                |
|-----------------------|----------------------------------------------------------------|
| Initial Tumor Burden: | 100-250 mm <sup>3</sup>                                        |
| T cells injected:     | 2 x 10 <sup>6</sup> CD4+ CAR+<br>2 x 10 <sup>6</sup> CD8+ CAR+ |

**Supplementary Fig. 7. Kaplan-Meier curve of NSG mice with 100-250 mm<sup>3</sup> initial tumors treated with 2 x 10<sup>6</sup> CD4+ and 2 x 10<sup>6</sup> CD8+ control or PD-1 edited anti-CD19 CAR+ T cells.** NSG mice were injected with 5 x 10<sup>6</sup> CD19+ PD-L1+ K562 cells subcutaneously. Mice with established tumors (100-250 mm<sup>3</sup>) were injected intravenously with 2 x 10<sup>6</sup> CD4+ CAR+ and 2 x 10<sup>6</sup> CD8+ CAR+ control T cells or PD-1 edited cells.



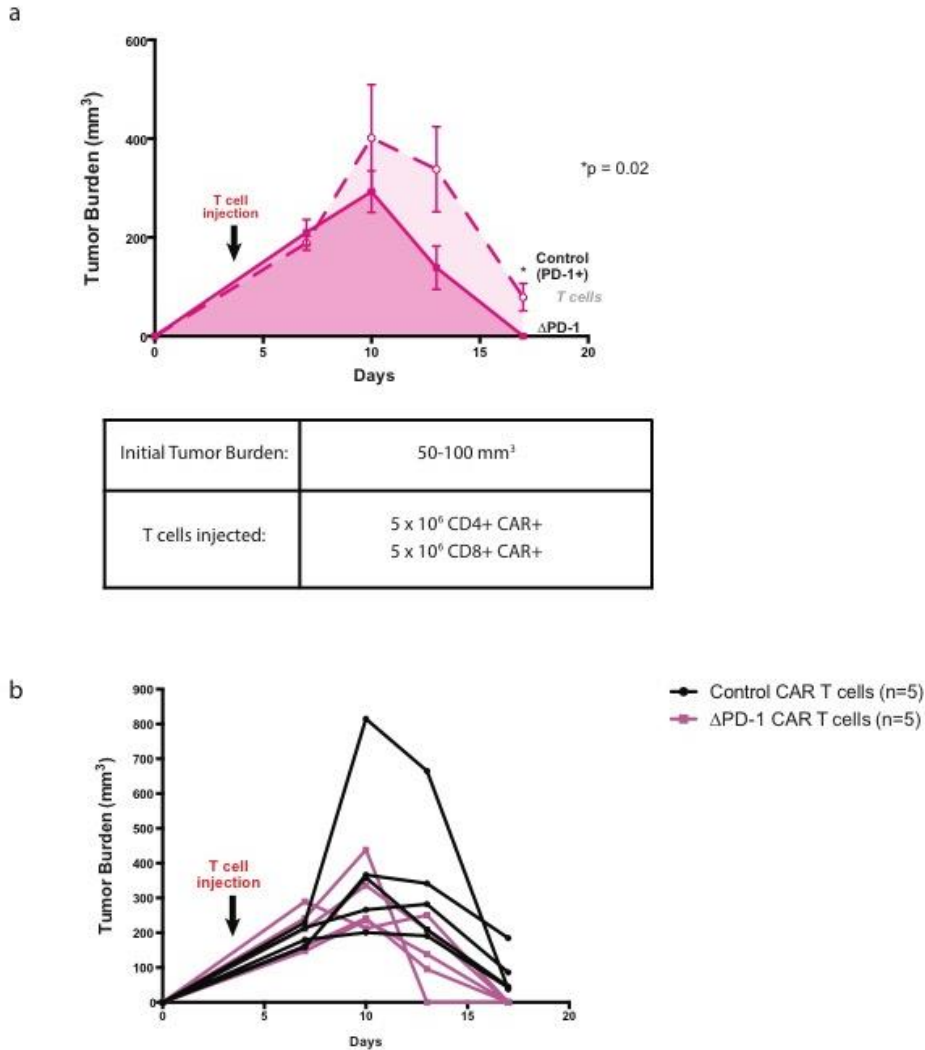

**Supplementary Fig. 8. Accelerated clearance of 50-100  $\text{mm}^3$  tumors with PD-1 edited CAR**

**T cells.** (a) NSG mice were injected with 5 x 10<sup>6</sup> CD19+ PD-L1+ K562 cells subcutaneously.

Mice with 50-100  $\text{mm}^3$  tumors were injected intravenously with 5 x 10<sup>6</sup> CD4+ CAR+ and 5 x 10<sup>6</sup> CD8+ CAR+ control T cells or PD-1 edited cells, and tumor burden measured longitudinally

by caliper. Tumor burdens are mean  $\pm$ SEM for each group (n=5 mice per group). 100% of

animals receiving PD-1 edited CAR T cells cleared tumors by day 18, versus 0% in the control

group (\*p=0.02, Student's t-test). (b) Longitudinal tumor burdens for individual mice from

experiment shown in (a).
